# Supplementary material for: Mortality after Use of Paclitaxel-Coated Balloons Correlates with Total Cumulative Dosage of Paclitaxel in Real-World Analysis
Source: MDPI journal article supplement (doi:10.3390/jcm10163747), 2021-08-23
Supplement: s1 [file s1]

**Table S1.** The interaction effects among variables used in the multivariable analysis.

| Effect.                                | <i>p</i> -value |
|----------------------------------------|-----------------|
| Age                                    | 0.0046          |
| Hyperlipidemia                         | 0.0679          |
| Smoking                                | 0.9143          |
| Chronic kidney disease                 | 0.2198          |
| Chronic kidney disease on hemodialysis | 0.2936          |
| Cancer                                 | 0.8822          |
| Critical limb ischemia (CLI)           | 0.0011          |
| Frequency of DCB use                   | 0.2181          |
| CLI * Frequency of DCB use             | 0.1832          |
| Total dosage of paclitaxel             | 0.0928          |
| CLI * Total dosage of paclitaxel       | 0.9437          |

CLI, critical limb ischemia; DCB, drug-coated balloon.

**Table S2.** Univariable (A) and multivariable (B) Cox regression analysis of the predictors of all-cause death in the claudication group.

(A)

| Effect                                | Hazard Ratio | 95% CI |         | <i>p</i> -value | Type 3 Analysis<br>of Effects<br><i>p</i> -value |
|---------------------------------------|--------------|--------|---------|-----------------|--------------------------------------------------|
| Gender_Female                         | 0.364        | 0.049  | 2.728   | 0.3254          | 0.3254                                           |
| Age                                   | 1.055        | 0.994  | 1.120   | 0.0789          | <b>0.0789</b>                                    |
| Diabetes                              | 1.329        | 0.501  | 3.524   | 0.5680          | 0.5680                                           |
| Hypertension                          | 0.695        | 0.250  | 1.938   | 0.4873          | 0.4873                                           |
| Hyperlipidemia                        | 0.810        | 0.329  | 1.999   | 0.6480          | 0.6480                                           |
| Coronary artery disease               | 1.457        | 0.591  | 3.591   | 0.4136          | 0.4136                                           |
| Smoking                               | 1.092        | 0.439  | 2.721   | 0.8495          | 0.8495                                           |
| Smoking_current                       | 1.293        | 0.475  | 3.522   | 0.6151          | 0.6151                                           |
| Chronic kidney disease                | 1.783        | 0.720  | 4.417   | 0.2115          | 0.2115                                           |
| Chronic kidney disease on HD          | 4.010        | 1.305  | 12.323  | 0.0153          | <b>0.0153</b>                                    |
| Cerebrovascular attack                | 0.499        | 0.115  | 2.162   | 0.3528          | 0.3528                                           |
| Chronic obstructive pulmonary disease | 0.436        | 0.024  | 7.888   | 0.5743          | 0.5743                                           |
| Cancer*                               | 5.585        | 2.054  | 15.191  | 0.0008          | <b>0.0008</b>                                    |
| Previous peripheral revascularization | 1.257        | 0.413  | 3.827   | 0.6866          | 0.6866                                           |
| B vs.. A                              | 5.514        | 0.459  | 66.278  | 0.3006          |                                                  |
| TASC C vs.. A                         | 3.951        | 0.270  | 57.914  | 0.6618          | 0.4047                                           |
| D vs.. A                              | 3.505        | 0.118  | 104.231 | 1.0000          |                                                  |
| Initial dosage of paclitaxel (mg)     | 1.044        | 0.982  | 1.110   | 0.1693          | 0.1693                                           |
| Total dosage of paclitaxel (mg)**     | 1.067        | 1.028  | 1.107   | 0.0006          | <b>0.0006</b>                                    |
| Frequency of DCB use**                | 3.864        | 2.005  | 7.447   | <0.0001         | <b>&lt;0.0001</b>                                |

\*: Newly diagnosed after initial treatment or active state that required treatment or follow up; \*\*: time-varyingcovariate. HD, hemodialysis; DCB, drug-coated balloon; CI: confidence interval; TASC, Trans Atlantic Inter-Society Consensus

(B)

| Effect                             | Adjusted Hazard Ratio | 95% CI |        | p-value |
|------------------------------------|-----------------------|--------|--------|---------|
| Age                                | 1.045                 | 0.982  | 1.113  | 0.1676  |
| Chronic kidney disease on HD       | 4.465                 | 1.282  | 15.554 | 0.0188  |
| Cancer*                            | 4.834                 | 1.671  | 13.982 | 0.0036  |
| Frequency of DCB use **            | 1.427                 | 0.711  | 2.864  | 0.3168  |
| Total dosage of paclitaxel (mg) ** | 1.043                 | 0.996  | 1.092  | 0.0722  |

\* Newly diagnosed after initial treatment or active state that required treatment or follow up; \*\* time-varying covariate. HD, hemodialysis; DCB, drug-coated balloon.

**Table S3.** Univariable (A) and multivariable (B) Cox regression analysis of the predictors of all-cause death in the critical limb ischemia group.

(A)

| Effect                                | Hazard Ratio | 95% CI |        | p-value | Type 3 Analysis of Effects p-value |
|---------------------------------------|--------------|--------|--------|---------|------------------------------------|
| Gender_Female                         | 1.168        | 0.594  | 2.296  | 0.6519  | 0.6519                             |
| Age                                   | 1.067        | 1.027  | 1.108  | 0.0009  | 0.0009                             |
| Diabetes                              | 1.210        | 0.529  | 2.768  | 0.6523  | 0.6523                             |
| Hypertension                          | 1.415        | 0.434  | 4.617  | 0.5649  | 0.5649                             |
| Hyperlipidemia                        | 0.394        | 0.180  | 0.864  | 0.0200  | 0.0200                             |
| Coronary artery disease               | 0.631        | 0.316  | 1.259  | 0.1914  | 0.1914                             |
| Smoking                               | 0.477        | 0.209  | 1.092  | 0.0799  | 0.0799                             |
| Smoking_current                       | 0.735        | 0.306  | 1.764  | 0.4907  | 0.4907                             |
| Chronic kidney disease                | 2.322        | 1.092  | 4.938  | 0.0287  | 0.0287                             |
| Chronic kidney disease on HD          | 1.229        | 0.606  | 2.493  | 0.5668  | 0.5668                             |
| Cerebrovascular attack                | 0.833        | 0.380  | 1.826  | 0.6478  | 0.6478                             |
| Chronic obstructive pulmonary disease | 2.161        | 0.517  | 9.036  | 0.2912  | 0.2912                             |
| Cancer*                               | 0.974        | 0.379  | 2.504  | 0.9569  | 0.9569                             |
| Previous peripheral revascularization | 4.226        | 1.901  | 9.397  | 0.0004  | 0.0004                             |
| B vs. A                               | 0.587        | 0.242  | 1.423  | 0.4497  |                                    |
| TASC C vs. A                          | 1.032        | 0.257  | 4.143  | 1.0000  | 0.0284                             |
| D vs. A                               | 5.414        | 0.799  | 36.687 | 0.1038  |                                    |
| Initial dosage of paclitaxel (mg)     | 1.063        | 1.002  | 1.128  | 0.0437  | 0.0437                             |
| Total dosage of paclitaxel (mg) **    | 1.036        | 0.997  | 1.078  | 0.0743  | 0.0743                             |
| Frequency of DCB use**                | 1.042        | 0.591  | 1.838  | 0.8872  | 0.8872                             |

\* Newly diagnosed after initial treatment or active state that required treatment or follow up; \*\* time-varying covariate; HD, hemodialysis; DCB, drug-coated balloon.

(B)

(Model 1)

| Effect                                | Adjusted Hazard Ratio | 95% CI |        | <i>p</i> -value | Type 3 Analysis of Effects<br><i>p</i> -value |
|---------------------------------------|-----------------------|--------|--------|-----------------|-----------------------------------------------|
| Age                                   | 1.037                 | 0.995  | 1.082  | 0.0874          | 0.0874                                        |
| Hyperlipidemia                        | 0.495                 | 0.209  | 1.173  | 0.1101          | 0.1101                                        |
| Smoking                               | 0.705                 | 0.285  | 1.748  | 0.4511          | 0.4511                                        |
| Chronic kidney disease                | 3.299                 | 1.366  | 7.967  | 0.0080          | 0.0080                                        |
| Previous peripheral revascularization | 4.068                 | 1.718  | 9.635  | 0.0014          | 0.0014                                        |
| B vs. A                               | 0.421                 | 0.153  | 1.158  | 0.1221          |                                               |
| TASC C vs. A                          | 0.565                 | 0.131  | 2.440  | 1.0000          | 0.0109                                        |
| D vs. A                               | 4.980                 | 0.513  | 48.376 | 0.2730          |                                               |
| Initial dosage of paclitaxel (mg)     | 1.053                 | 0.987  | 1.124  | 0.1170          | 0.1170                                        |

(Model 2)

| Effect                                | Adjusted Hazard Ratio | 95% CI |        | <i>p</i> -value | Type 3 Analysis of Effects<br><i>p</i> -value |
|---------------------------------------|-----------------------|--------|--------|-----------------|-----------------------------------------------|
| Age                                   | 1.039                 | 0.995  | 1.084  | 0.0800          | 0.0800                                        |
| Hyperlipidemia                        | 0.400                 | 0.166  | 0.964  | 0.0412          | 0.0412                                        |
| Smoking                               | 0.698                 | 0.281  | 1.734  | 0.4389          | 0.4389                                        |
| Chronic kidney disease                | 3.815                 | 1.565  | 9.296  | 0.0032          | 0.0032                                        |
| Previous peripheral revascularization | 4.159                 | 1.751  | 9.881  | 0.0012          | 0.0012                                        |
| B vs. A                               | 0.461                 | 0.177  | 1.199  | 0.1572          |                                               |
| TASC C vs. A                          | 0.521                 | 0.120  | 2.252  | 0.8583          | 0.0100                                        |
| D vs. A                               | 5.818                 | 0.622  | 54.433 | 0.1782          |                                               |
| Total dosage of paclitaxel (mg)*      | 1.046                 | 1.007  | 1.087  | 0.0198          | 0.0198                                        |

\* Time-varying covariate.
